1 **Similarities Between Somatosensory Cortical Responses Induced via Natural Touch and**  
2 **Microstimulation in the Ventral Posterior Lateral Thalamus in Macaques**

3 **Joseph Thachil Francis**<sup>1,2\*</sup>, **Anna Rozenboym**<sup>2,3</sup>, **Lee von Kraus**<sup>2</sup>, **Shaohua Xu**<sup>2</sup>, **Pratik**  
4 **Chhatbar**<sup>2,4</sup>, **Mulugeta Semework**<sup>2</sup>, **Emerson Hawley** and **John Chapin**<sup>2</sup>

5 <sup>1</sup> Cullen College of Engineering, Departments of Biomedical Engineering and Electrical and Computer  
6 Engineering, University of Houston, Houston, TX, USA

7 <sup>2</sup> State of New York Downstate Medical School, Department of Physiology and Pharmacology,  
8 Brooklyn, NY, USA

9 <sup>3</sup> Department of Biological Sciences, Kingsborough Community College, CUNY, Brooklyn, NY

10 <sup>4</sup> Department of Neurology, Duke University School of Medicine, Durham, NC

11

12 **\*Correspondence:**  
13 Corresponding Author  
14 [Joey199us@gmail.com](mailto:Joey199us@gmail.com)

15 **Keywords: Somatosensory, Neuroprosthesis, Thalamus, Cortex, Brain Machine Interfacing.**

16

17

18

19

20

21

22

23

24

25

26

27

28

29

## Thalamic Microstimulation Towards Somatosensory Neuroprosthetics

30

### 31 **ABSTRACT**

32 Lost sensations, such as touch, could be restored by microstimulation (MiSt) along the sensory neural  
33 substrate. Such neuroprosthetic sensory information can be used as feedback from an invasive brain-  
34 machine interface (BMI) to control a robotic arm/hand, such that tactile and proprioceptive feedback  
35 from the sensorized robotic arm/hand is directly given to the BMI user. Microstimulation in the human  
36 somatosensory thalamus (Vc) has been shown to produce somatosensory perceptions. However, until  
37 recently, systematic methods for using thalamic stimulation to evoke naturalistic touch perceptions  
38 were lacking. We have recently presented rigorous methods for determining a mapping between  
39 ventral posterior lateral thalamus (VPL) MiSt, and neural responses in the somatosensory cortex (S1),  
40 in a rodent model (Choi et al., 2016; Choi and Francis, 2018). Our technique minimizes the difference  
41 between S1 neural responses induced by natural sensory stimuli and those generated via VPL MiSt.  
42 Our goal is to develop systems that know what MiSt will produce a given neural response and possibly  
43 a more natural "sensation." To date, our optimization has been conducted in the rodent model and  
44 simulations. Here we present data from simple non-optimized thalamic MiSt during peri-operative  
45 experiments, where we MiSt in the VPL of macaques with a somatosensory system more like humans.  
46 We implanted arrays of microelectrodes across the hand area of the macaque S1 cortex as well as in  
47 the VPL thalamus. Multi and single-unit recordings were used to compare cortical responses to natural  
48 touch and thalamic MiSt in the anesthetized state. Post stimulus time histograms were highly  
49 correlated between the VPL MiSt and natural touch modalities, adding support to the use of VPL MiSt  
50 towards producing a somatosensory neuroprosthesis in humans.

51

### 52 **Introduction**

53 Our overall aim in this line of work is to find a method that would allow us to use MiSt or other neural  
54 stimulation modalities, and emulate natural neural responses in the somatosensory cortices (S1) and

## Thalamic Microstimulation Towards Somatosensory Neuroprosthetics

55 other somatosensory regions as determined necessary for the perception of touch. We hypothesize  
56 that similarity of neural responses following MiSt and tactile stimulation will translate into similarity of  
57 perceptions. On the other hand, MiSt that produces “unnatural” neural patterns will not result in  
58 “natural” touch perception. Therefore, if we can determine the best locations and patterns to produce  
59 such naturalistic neural responses, we should create more natural sensations. We may need to  
60 consider the neural response in a more extensive set of structures to fine-tune this approach to  
61 achieve this goal. Here, we present our findings in a non-human primate (NHP) model. We started  
62 with responses in S1 to natural touch as our template in which to optimize our VPL MiSt-induced  
63 responses as shown in our previous rat and simulation-based studies (Brockmeier et al., 2011; Choi  
64 et al., 2012, 2016; Li et al., 2013b, 2013a, 2015; Choi and Francis, 2018). We note that the results  
65 presented in this paper were recorded circa 2008 and the above optimization methods had not been  
66 developed or implemented. However, we feel these results from the NHPs should be shared as we  
67 move towards human implementation of these systems, where we can directly interrogate our  
68 underlying hypothesis that more naturalistic S1 responses lead to more naturalistic sensations. The  
69 rodent somatosensory system is significantly different from humans and NHPs we utilized (Francis et  
70 al., 2008). Here we used simple non-optimized MiSt in the acute NHP preparation and show that the  
71 somatotopy is generally well-maintained with VPL MiSt, comparable to natural touch in the NHP, as  
72 in the rodent (see discussion).

73

74 It has been demonstrated that neuronal activity in the motor cortex can be used to directly control  
75 computer cursors and robotic systems via a BMI (Chapin et al., 1999; Serruya et al., 2002; Taylor et  
76 al., 2002; Hochberg et al., 2006; Ganguly and Carmena, 2009; Ajiboye et al., 2017; Degenhart et al.,  
77 2020). Recently, interest in BMIs has exploded as it has become clear that such systems are likely to  
78 restore motor function lost due to spinal cord injury (SCI), neurological disease, or amputation. Such  
79 BMIs require a closed-loop configuration that uses not only real-time neural data to move an actuator,  
80 such as a robotic arm, but also delivers sensory feedback to the user (Flesher et al., 2021). To date,

## Thalamic Microstimulation Towards Somatosensory Neuroprosthetics

81 this feedback has come mainly through the intact visual system of the user who is viewing their  
82 performance with the BMI. However, it is known that natural reaching and dexterous tasks require  
83 somatosensory feedback for high levels of performance and control. Therefore, somatosensory  
84 feedback from sensors on a neurally controlled prosthetic arm/hand presented directly to the user via  
85 MiSt of the neural substrate should lead to a better controlled prosthetic. This somatosensory  
86 feedback, along with visual feedback, helps control such devices and allows them to become one with  
87 the user.

88

89 The use of cortical MiSt to directly introduce information into the brain has been demonstrated with  
90 some success (Talwar et al., 2002; Fitzsimmons et al., 2007; London et al., 2008; O'Doherty et al.,  
91 2011; Flesher et al., 2016, 2021). Several investigators have shown that macro- and microelectrode  
92 stimulation in the human somatosensory thalamus (ventral caudal nucleus Vc, referred to as the  
93 Ventral Posterior Lateral in other mammals (VPL), and nearby thalamus) can produce a variety of  
94 somatosensations, including both natural and artificial, ranging from perceptions of touch or  
95 movement to sensations of hot or cold, tingling, or the sense of pressure (Lenz et al., 1995; Davis et  
96 al., 1998, 1999; Kiss et al., 2003b; Ohara et al., 2004; Chien et al., 2017). In many cases, the elicited  
97 sensation depended on the stimulus frequency and its amplitude (Patel et al., 2006). Proprioceptive  
98 and cutaneous sensory modalities were found to segregate between different regions of the thalamus  
99 as described in the literature (Sacco et al., 1987; Kaas, 2007; Francis et al., 2008). This separation  
100 should help produce separate touch and proprioceptive channels for sensory input via MiSt or other  
101 stimulation modalities.

102

103 Although human thalamic studies have been beneficial in demonstrating conscious perceptions  
104 induced by (Vc/VPL) electrical stimulation, we still lack a method for producing reliably “normal”  
105 sensations. When conducting intraoperative experiments on humans, there are several constraints,

## Thalamic Microstimulation Towards Somatosensory Neuroprosthetics

106 such as the amount of time one must rigorously explore the stimulation state space and ethical  
107 concerns that limit the areas from which one can sample. Much work on humans has utilized large  
108 (>1 mm) macroelectrodes, which are often intended for deep brain stimulation (DBS) to alleviate  
109 movement disorders such as tremor or to alleviate chronic pain. This stimulation is generally at high  
110 frequencies (100-300 Hz). Kiss et al. (Kiss et al., 2003a) have suggested that such macrostimulation  
111 may activate a neural area 4000-fold greater than MiSt. This more extensive activation may cause  
112 tingling or other paresthetic sensations through the widespread recruitment of axons and neurons.

113

114 With these limitations in mind, as an initial step toward developing an optimized somatosensory  
115 neuroprosthesis in humans, we have utilized multielectrode neurophysiological techniques in  
116 encephalated NHPs (*Macaca radiata*) to determine how thalamic MiSt might be used to evoke neural  
117 responses in the somatosensory cortex (S1). As the macaque has a similar somatosensory stream to  
118 humans, it is a more suitable animal model for such work as compared to the rodent model (Kaas,  
119 2007; Francis et al., 2008). Our protocol involved implantation of multi-electrode arrays in the hand  
120 representations of the VPL (VPL; 4 electrodes) and primary somatosensory (S1) cortex (32  
121 electrodes). These simultaneous recordings allowed us to record the response patterns of hundreds  
122 of single and multi-units in the S1 cortex during computer-controlled natural touch stimulation and  
123 MiSt in somatotopographically equivalent areas of the VPL. These acute experiments allowed us to  
124 directly and quantitatively compare the post-stimulus responses evoked by natural touch and VPL  
125 MiSt in S1 in anesthetized subjects intraoperatively. We used MiSt in the low-frequency range ( $\leq 5$   
126 Hz), with the work presented here held to just one biphasic MiSt pulse in the VPL. Here we show that  
127 simple MiSt in the VPL elicits S1 cortical responses with similar properties, such as amplitude and  
128 duration, to those induced via natural touch, at least in the anesthetized state. Thus, we add evidence  
129 that utilizing such VPL-MiSt may be suitable for a somatosensory neuroprosthesis.

130

## Thalamic Microstimulation Towards Somatosensory Neuroprosthetics

### 131 **METHODS**

132 All work adhered to NIH Guide for the Care and Use of Laboratory Animals and was approved by  
133 SUNY Downstate's IACUC and followed the recommendations of the Weatherall report, "The use of  
134 non-human primates in research". All efforts were made to minimize animal suffering, including  
135 anesthetics for all surgical procedures (see below). For this work, animals were given ad lib food and  
136 water.

137

138 **Surgical preparation and recordings:** All experiments were conducted in the acute anesthetized  
139 preparation. Monkeys (*Macaca radiata*) were initially anesthetized with Ketamine (15mg/kg) and  
140 intubated to allow controlled ventilation and administration of Isoflurane at 0.5-3% in (95% O<sub>2</sub>).  
141 Fentanyl (I.V.) 2-5 mcg/kg/hr was used throughout the surgery to further ensure no pain would be felt.  
142 After anesthesia had been established, the animal was placed in a stereotactic frame. A midline  
143 incision was made, and the skin retracted above the central sulcus. Craniotomies were performed  
144 directly over the arm regions in S1 and above the VPL thalamic nucleus (see atlas (Paxinos et al.,  
145 2000)). We first implanted the S1 cortical electrode arrays in the granular layers and then performed  
146 a series of natural touch stimulation experiments to define the precise skin-to-cortex representation in  
147 that animal. The implanted cortical electrodes were left in place for the remainder of that experiment.

148

149 Next, we slowly drove the thalamic electrode array into the VPL thalamus guided by the macaque  
150 atlas (Paxinos et al., 2000). We stopped at 100  $\mu$ m intervals to record neuronal RFs and then MiSt at  
151 different currents while simultaneously recording multi and single-unit activity from the S1 electrode  
152 array. We obtained large data sets that provided a comprehensive record of the somatotopographic  
153 relationships between the skin, the VPL, and the S1 cortex. Subsequently, we searched a subset of  
154 the VPL stimulus parameter space. To maintain consistency of the subjects for a given experiment,

## Thalamic Microstimulation Towards Somatosensory Neuroprosthetics

155 the NHPs hand was held in place with a ring stand and flexible cord. At the same time, the factor was  
156 attached to a second ring stand and positioned to touch the desired region of skin.

157

158 We will refer to the brain region stimulated by the touch of a single point on the periphery as a  
159 **Stimulus Field (SF)** compared to a **Receptive Field (RF)**, which is the peripheral domain that can  
160 elicit a response from a single neuron. Specifically, the region of S1 that is stimulated by either touch  
161 of a point on the periphery, an S1-SF, or to VPL-MiSt at a point in the VPL that is a VPL-MiSt induced  
162 S1-SF.

163

164 **Electrodes:** Implanted electrodes consisted of an array of 32 sharp (35  $\mu\text{m}$  diameter) Tungsten  
165 electrodes for acute NHP experiments. Each array was arranged in 2 parallel rows, each with 16  
166 electrodes spaced  $\sim 300 \mu\text{m}$  apart. After craniotomy and removal of the dura to expose the hand area  
167 in the vicinity of the central sulcus, the electrode array was positioned on the lip of the post-central  
168 gyrus such that the anterior row of electrodes was placed about 1 mm caudal to the central sulcus  
169 and its parallel row was placed 1 mm caudal to that. This puts the electrode array in area 1 on the  
170 cortical surface but into area 3b as one drives the array deeper (Paxinos et al., 2000). We have pooled  
171 our data in much of the analysis here and thus do not make claims to be recording from area 1 or 3b  
172 specifically.

173

174 All the electrode tips were placed flush on the cortex and then slowly driven down until layers III-IV  
175 were reached. These electrodes then remained in place, allowing the same single and multiunit  
176 clusters to be recorded simultaneously during up to 165 stimulation experiments. Our VPL array  
177 consisted of 4 sharp stainless-steel electrodes in a square array with 1.0 mm separation. This array  
178 was used for both recording and stimulation. The VPL array was progressively driven down through

## Thalamic Microstimulation Towards Somatosensory Neuroprosthetics

179 the VPL's somatotopic representation of the cutaneous periphery, allowing us to record and stimulate  
180 for a series of experiments.

181

182 **Neural recording and analysis:** The Plexon Inc. multichannel acquisition processor (MAP) system  
183 was used for online data acquisition and spike discrimination. An offline sorter was used for post-hoc  
184 re-discrimination. The Plexon Offline Sorter provided a variety of methods for post-hoc single unit  
185 discrimination. Conventional approaches were used for general spike separation and removal of  
186 stimulus artifacts. Data analysis utilized the NEX neurophysiology analysis system and its Matlab and  
187 Excel extensions. Statistica was used for statistical analysis and plotting.

188

189 We simultaneously recorded multiple neuronal waveforms from each of the electrodes and then  
190 performed offline discrimination. First, we lumped together the neural recordings from each electrode,  
191 allowing accurate estimation of the neural population responses from each cortical location. We then  
192 used a peak detection algorithm to find the maximum response from all electrodes. The simplest and  
193 most reliable method was to record the multi-unit activity from each electrode, use computer  
194 algorithms to measure the maximal response peaks and background activity in post-stimulus  
195 histograms, and then convert the response amplitudes into Z-scores, which could be normalized  
196 across the entire electrode array.

197 To minimize contamination from the VPL MiSt artifact, we blanked out the first 2 ms following  
198 stimulation, which should be under the amount of time it takes for conduction of an action potential  
199 from the VPL to the S1 cortex as well as subsequent action potential generation in the S1 cortical  
200 recipient neurons. In addition, we sorted the stimulus artifact as a unit in our template sorting method  
201 stated above and did not include these "units" representing the stimulus artifacts, which are very  
202 stereotypical and easily clustered, in our analysis.



## Thalamic Microstimulation Towards Somatosensory Neuroprosthetics

203

204 **Tactile stimuli:** Mechanical touch stimuli were applied to different regions of the hand and forearm  
205 using a computer-driven vibromechanical actuator to deliver mechanical pulses to the skin. Our  
206 standard stimulus was a single pulse producing <1 mm skin displacement for ~1ms, delivered at rates  
207 of 5 Hz. The touch experiments involved serially tapping up to 12 locations on the hand. These results  
208 were then compared with electrical MiSt in the VPL. A single experiment lasted for 90 seconds and  
209 included tapping at only one position on the hand. Likewise, all microstimulation experiments lasted  
210 for 90 seconds and included stimulating in one electrode configuration with a given stimulus waveform.

211

212 **Multichannel microstimulator:** We developed a modular 16-channel bipolar constant-current MiSt  
213 system capable of producing any arbitrary pattern of brain stimuli through multi-electrodes. Single  
214 and/or 2-electrodes were employed to produce MiSt. All VPL stimuli were made using bipolar stimuli  
215 to minimize the stimulus artifact through closely spaced pairs of electrodes. All stimuli were biphasic,  
216 normally with the anode first. Cathode-first trials were also investigated but did not produce obvious  
217 differences. MiSt pulse widths ranged from 100-500  $\mu$ s. Stimulus currents ranged from 25-100  $\mu$ A.  
218 Stimuli consisted of a single biphasic pulse. For all the data presented in this paper, the MiSt was  
219 biphasic and bipolar utilizing 200  $\mu$ sec duration phases. We did not specifically search the MiSt state  
220 space for exact thresholds; instead, we used 25, 50, 75, and 100  $\mu$ A as our test amplitudes. These  
221 amplitudes were chosen after brief preliminary work that spanned responses from “weak” to “strong”  
222 and enveloped the natural touch responses, as can be seen in the figures.

223

## 224 **RESULTS:**

225 A total of 357 recording experiments were conducted on 3 NHPs. All utilized simultaneous recordings  
226 from the S1 cortical hand area using spaced electrode arrays consisting of 2 rows of electrodes (2x16

## Thalamic Microstimulation Towards Somatosensory Neuroprosthetics

227 electrodes). These experiments yielded neural activity from stimulus fields driven by a natural touch  
228 of the hand, or MiSt in the VPL at varying stimulus intensities, where a stimulus field is defined as the  
229 brain region responsive to touch at a single point on the periphery, or MiSt at a single point in the VPL.  
230 Each experiment typically involved approximately 450 stimulus presentations (at 5 Hz) of touch or  
231 VPL MiSt. All NHPs also received a 2 x 2 electrode array implanted in the VPL thalamus.

232

233 **Qualitative results:** In Fig.1, we have plotted the raw post-event-rasters and their associated post-  
234 event-time-histograms below them induced via a natural touch of the fingers. For plots with numbers  
235 less than 8 (e.g., sig001i), these are multiunit activity recorded from the VPL, and channels above 8  
236 (e.g., sig021i) are from the S1 cortex. Notice the variety of responses, some with early phasic  
237 response, others with a later phasic response, and some with both an early and a late response such  
238 as sig001i. In Fig.2, we have plotted the same type of activity as in Fig.1, but for the MiSt-induced  
239 responses in the cortex. In Fig.2, all the raster histogram pairs are in response to 25 $\mu$ A biphasic  
240 stimulation. In addition, for two multi-units, we have plotted the responses to several amplitudes of  
241 MiSt as denoted in the key. Note the different scales on the y-axis. Most of these units that had a  
242 significant response also had a simple phasic response, as seen in Fig.1.

243

244

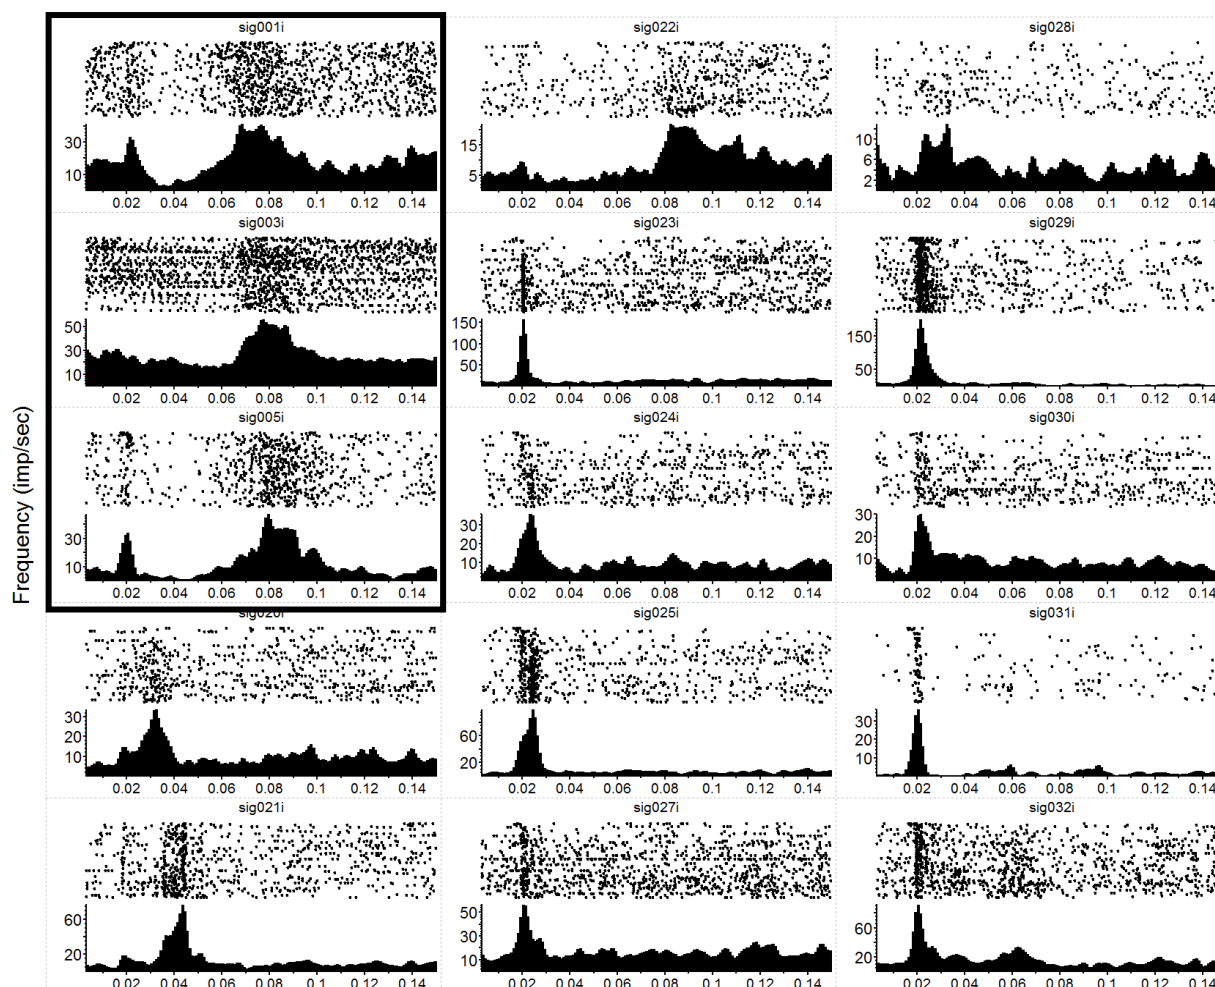

245

246 **Fig 1.** Neural Responses to Mechanical Stimulation. Raw data showing Post-Stimulus-Time-Rasters  
247 with their corresponding Post-Stimulus-Time-Histograms below for a subset of the 36 recording  
248 electrodes during a single mechanical touch experiment. In this experiment, we touched the  
249 anesthetized NHP's hand at 1 position at a frequency of 5 Hz. Each raster-histogram pair is labeled  
250 with the electrode channel number, where sig < 8 are VPL thalamic channels (first 3 panels on the left  
251 column, marked by the surrounding box) and sig > 8 are S1 cortical channels. The i indicates that  
252 these are unsorted units; thus, we are showing the multiunit activity recorded on each channel. There  
253 was a 4-electrode array in the thalamus (2 x 2, with 1mm spacing) and a 32-channel array in the cortex  
254 (2 x 16, with an intra-row spacing of 300  $\mu$ m and inter-row distance of 1 mm). Note the diversity of  
255 responses and the differences in the y-axis, which is the unsorted units firing rate in Hz, while the x-

## Thalamic Microstimulation Towards Somatosensory Neuroprosthetics

256 axis is time in seconds. PSTH bins were 1 ms and smoothed with a 3 ms Gaussian moving window.  
257 The time axis starts at 3 ms to match the x-axis with Fig. 2 (where MiSt stimulus artifact required  
258 blanking of the first couple of ms).

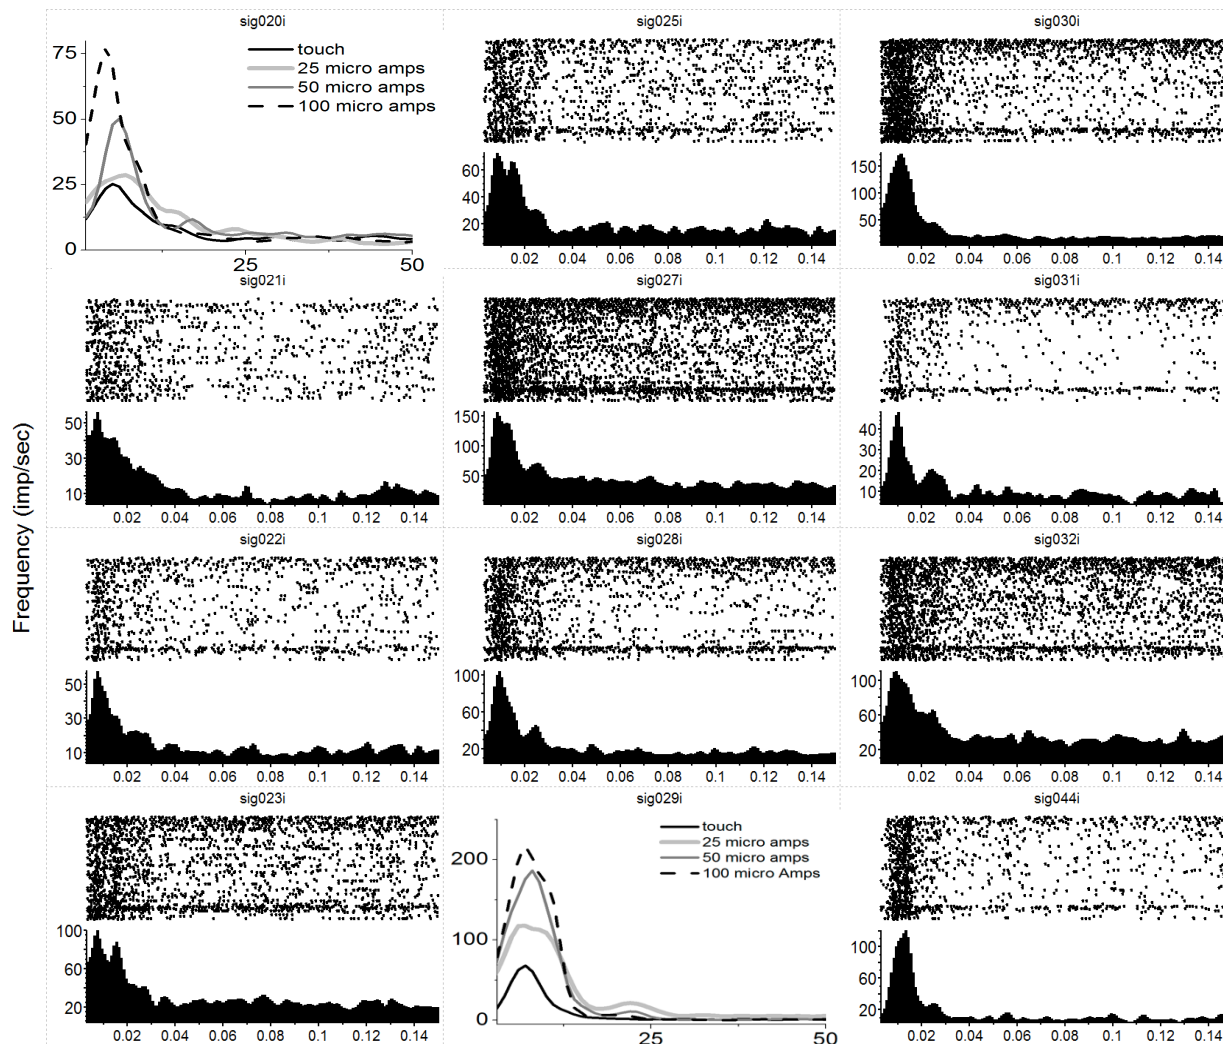

259

260 **Fig. 2.** Neural Responses in S1 to MiSt in the VPL thalamus. Each peri-event raster and histogram  
261 pair are in response to a 25 $\mu$ A single biphasic bipolar pulse stimuli in the VPL. For panels showing  
262 multiple histograms, the current used is labeled in the key, and responses from the mechanical touch  
263 were shifted in time to align with the MiSt-induced responses; the x-axis for these plots is bin number  
264 at 3ms bins. Processing was as in Fig. 1. Note that most responses are on the order of 15 – 20 ms.

## Thalamic Microstimulation Towards Somatosensory Neuroprosthetics

265 As this was in response to MiSt, the responses are all shifted to the left; they occur sooner than would  
266 be the case if due to touch on the periphery as there is no peripheral transmission delay.

267

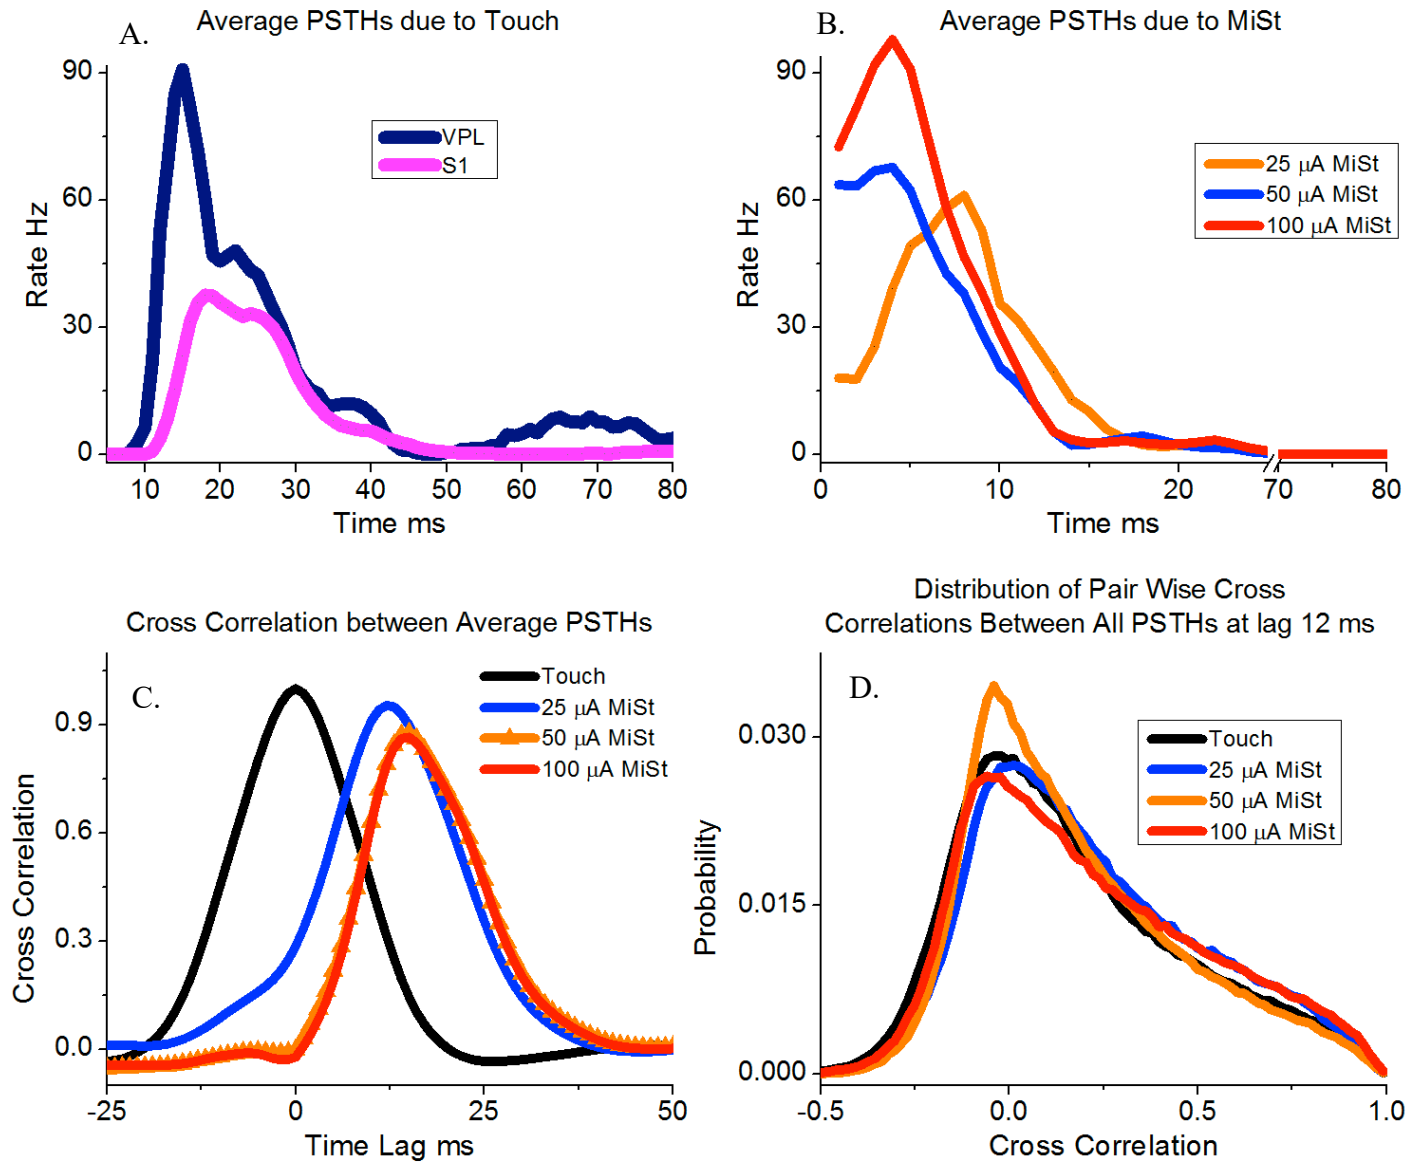

268

269

270 **Fig. 3. A**, Average thalamic and S1 neural responses induced by the touch of the periphery using only  
271 channels that had a significant response for this average (N = 1239). **B**, Responses for three  
272 amplitudes of microstimulation, again only using the channels with significant responses defined as

## Thalamic Microstimulation Towards Somatosensory Neuroprosthetics

273   peaks of 3 STDs or more (N = 438, 631 and 420 for 25, 50, and 100  $\mu$ A respectively). **C**,  
274   Crosscorrelation between the average PSTHs for touch vs. the three MiSt amplitudes used most  
275   during our study. **D**, Pair-wise crosscorrelation distribution between all pairs of PSTHs between touch  
276   and MiSt amplitudes. The touch-induced PSTHs were time-shifted by 12 ms as this led to the smallest  
277   sum of squared differences between the three MiSt distributions and the touch-induced distribution.

278

279   **Somatotopy:** We found an obvious relationship (somatotopy) from the peripheral touch to the VPL  
280   as expected from the literature on these and other mammals (Krubitzer and Kaas, 1992; Kaas, 2007;  
281   Francis et al., 2008). In addition, we witnessed the expected somatotopy between the VPL and primary  
282   somatosensory cortex (Kaas, 2007) and found the VPL MiSt maintained these relations. Thus, VPL  
283   MiSt on an electrode responding to digit one touch would produce comparable S1 responses in the  
284   same cortical area activated by a natural touch of digit one.

285

286   The results from a set of typical experiments on an anesthetized NHP are shown in Fig. 4, where we  
287   have drawn a cartoon of the NHP hand color-coded according to induced neural responses found in  
288   either the VPL (Fig.4.C) or S1 (Fig.4.B). Panel B depicts the electrode array in S1 color-coded based  
289   on points of the hand and their associated S1-SF, with VPL-SF shown in panel C. In panel D, we  
290   show the bipolar pairs of electrodes that were used for VPL-MiSt. Note that VPL electrodes 1 and 2  
291   had strong responses to touch (SF) while electrodes 3 and 4 had weak responses, implying that 3  
292   and 4 were just outside the core VPL. In support of this is the fact that all pairs lead to just one S1-SF  
293   except for the strong response pair of VPL electrodes (1 and 2), which leads to a response of both  
294   S1-SFs that are concordant with those SFs seen in the thalamus. Thus, these results imply that if we  
295   have thalamic receptive fields for each of the digits as well as those tessellating the palm, we should  
296   be able to generate S1 cortical responses representing any portion of the hand.

# Thalamic Microstimulation Towards Somatosensory Neuroprosthetics

297

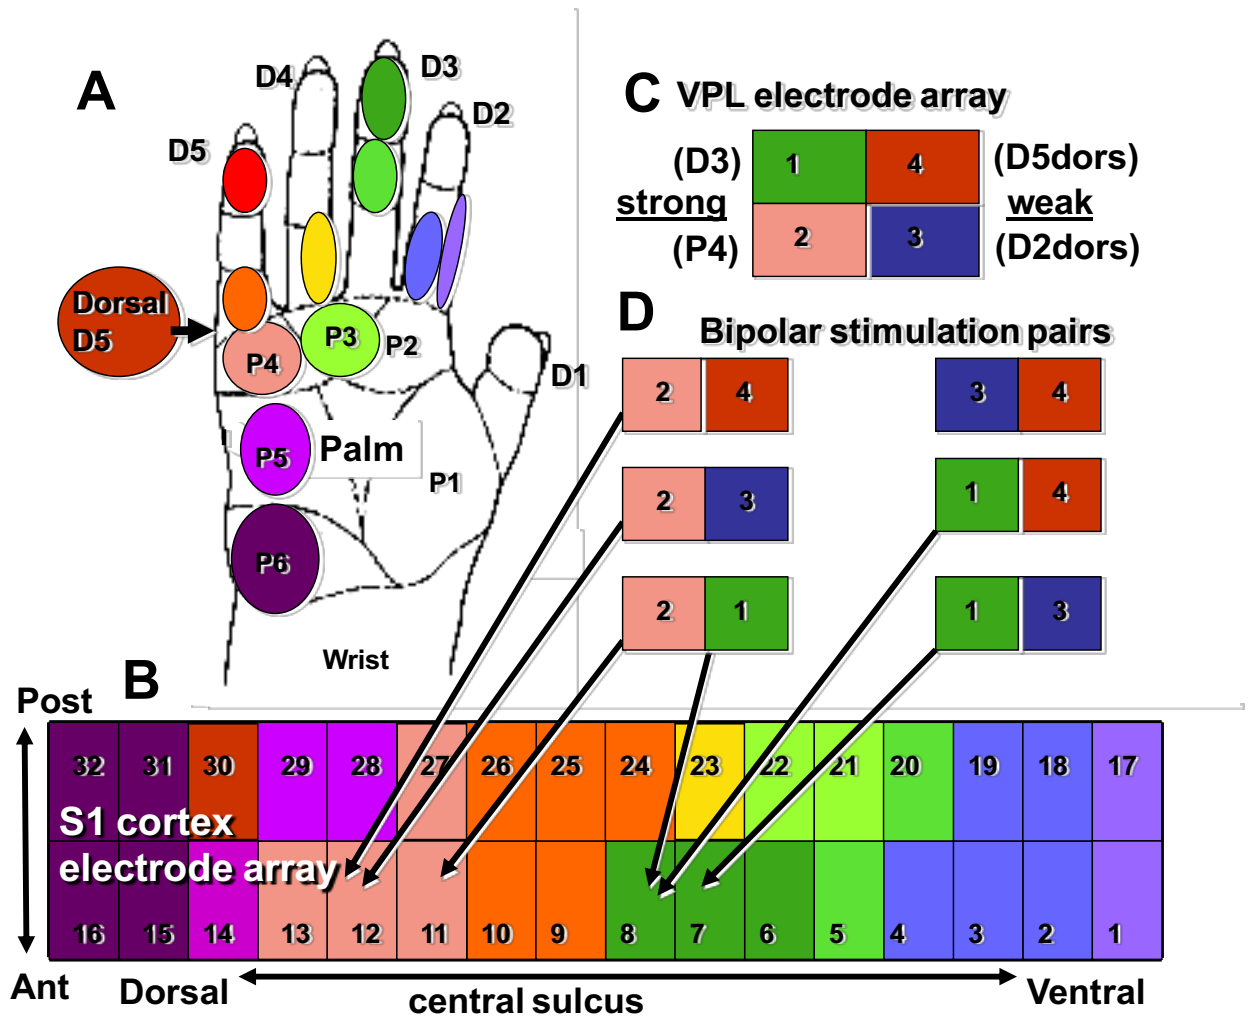

298

299 **Fig. 4:** This cartoon Test results for concordance between responses in the somatosensory cortex to  
 300 natural touch and VPL-MiSt through electrodes with similar stimulus fields to those seen on the S1  
 301 electrodes. **A.** Diagram of the NHP's hand labeled and color-coded with positions that were stimulated  
 302 via our factor. These same colors are used to describe the stimulus fields on the S1 electrodes (**B**)  
 303 and VPL electrodes (**C**). **D.** Are the VPL electrode pairs used for our bipolar microstimulation. Note  
 304 that two of the four VPL electrodes recorded strong SF to touch (1, 2) while the other two were weak  
 305 (3, 4) and possibly on the boundary of the VPL. The terms D2dors and D5dors are the digit number  
 306 on the dorsal surface. Due to this arrangement, the cortical stimulus fields to VPL stimulation are  
 307 governed by the strong VPL channels. See Choi et al. 2016 for a similar relationship in the rat.



## Thalamic Microstimulation Towards Somatosensory Neuroprosthetics

308

309 In Fig. 5, we describe the topographic associations between the periphery, the VPL, and the S1 cortex.  
310 Our electrode array was situated caudal to and parallel with the central sulcus. Electrodes 1 and 17  
311 were most lateral and electrodes 16 and 32 most medial, the peak induced neural activity forms a  
312 diagonal band as seen in Fig.5. This banding simply reaffirms the known somatotopy. For instance, it  
313 is known that digit one is represented lateral to digit 4, which can be seen in this figure as channel 1  
314 has a peak in activity in the lateral electrodes numbered one and 17. In contrast, the peak activity for  
315 digit four is seen more medially on electrodes 3, 4, 5, 18, 19, and 21. As stated the color code at the  
316 right depicts the z-score for each point, e.g. 2 =  $p < .05$  and 3 =  $p < .003$ . One can see in Fig.5 that  
317 some of the tactile stimulation-induced responses are focal such as for D1, whereas others are more  
318 diffuse such as for P4. As all the MiSt in these experiments were bipolar, with electrodes separated  
319 by 1 mm, the neural responses could have two peaks, such as for the D4-P1,2 stimulation, where  
320 underlining indicates this was a VPL-MiSt induced response.

321

322

323



## Thalamic Microstimulation Towards Somatosensory Neuroprosthetics

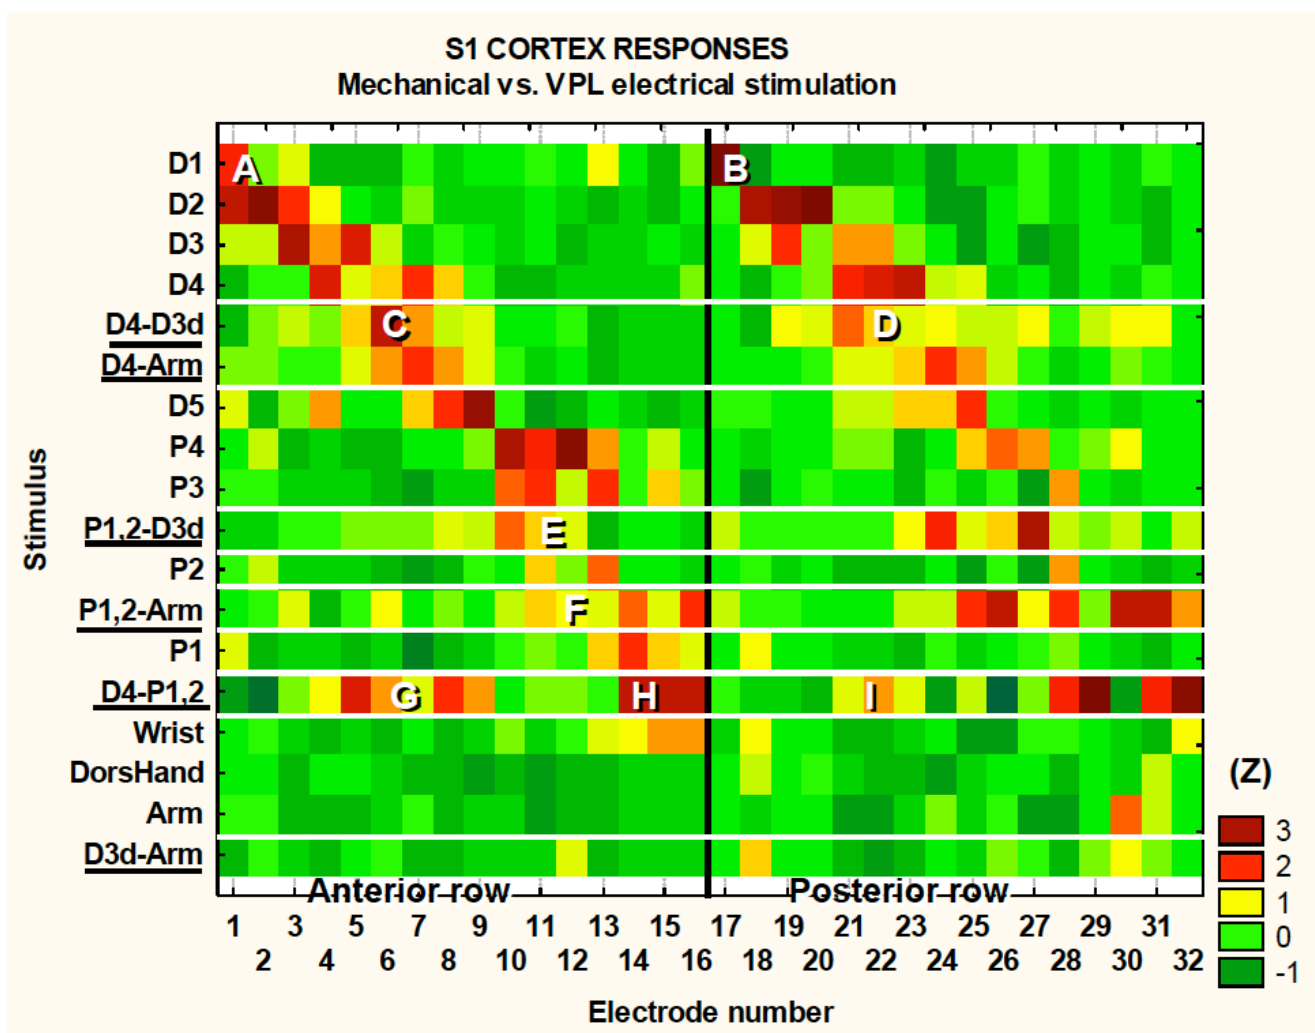

324

325 **Fig. 5: S1 somatotopy in response to touch and VPL-MiSt.**

326 Shown are the results from 18 SFs recorded in S1 during 12 natural touch and 8 VPL-MiSt  
 327 experiments (underlined, e.g., D4-Arm). VPL-MiSt was between two electrodes, where one electrode  
 328 could have one SF, such as D4, and the other could be an Arm SF. Thus, the VPL-MiSt is labeled by  
 329 both (D4-Arm). We have ordered the data in the expected somatotopic progression starting with D1.  
 330 The color code at right depicts the z-scored significance for each point, e.g., 2 =  $p < .05$  and 3 =  $p <$   
 331  $.003$  (see methods).

332

## Thalamic Microstimulation Towards Somatosensory Neuroprosthetics

333 **MiSt Responses:** In general, MiSt at currents up to 100  $\mu\text{A}$  produced localized responses within S1.  
 334 Fig.6.A shows examples of 4 averaged cortical responses sequentially recorded during natural touch  
 335 of Digit3 and MiSt in the VPL - Digit3 representation at currents of 25, 50, and 100  $\mu\text{A}$ . These results  
 336 were typical in that both VPL MiSt and natural touch stimuli produced peaked cortical responses with  
 337 a prominent center flanked by decaying surrounds. This basic pattern was consistent across our  
 338 sample. Fig.6.B shows the average of 15 cortical responses recorded during natural touch  
 339 experiments and 7 from 75  $\mu\text{A}$  VPL MiSt. These averaged responses depict the statistical means and  
 340 standard errors for each electrode in an S1 cortical array. We have aligned all the data such that the  
 341 peaks correspond. These results demonstrate that: 1) VPL MiSt produces distinctly peaked cortical  
 342 responses in S1. 2) The cortical response amplitudes and widths correlate with stimulus current  
 343 (Fig.6.A). 3) The cortical responses induced via VPL MiSt are comparable to those induced via natural  
 344 touch (Fig.6.B).

345

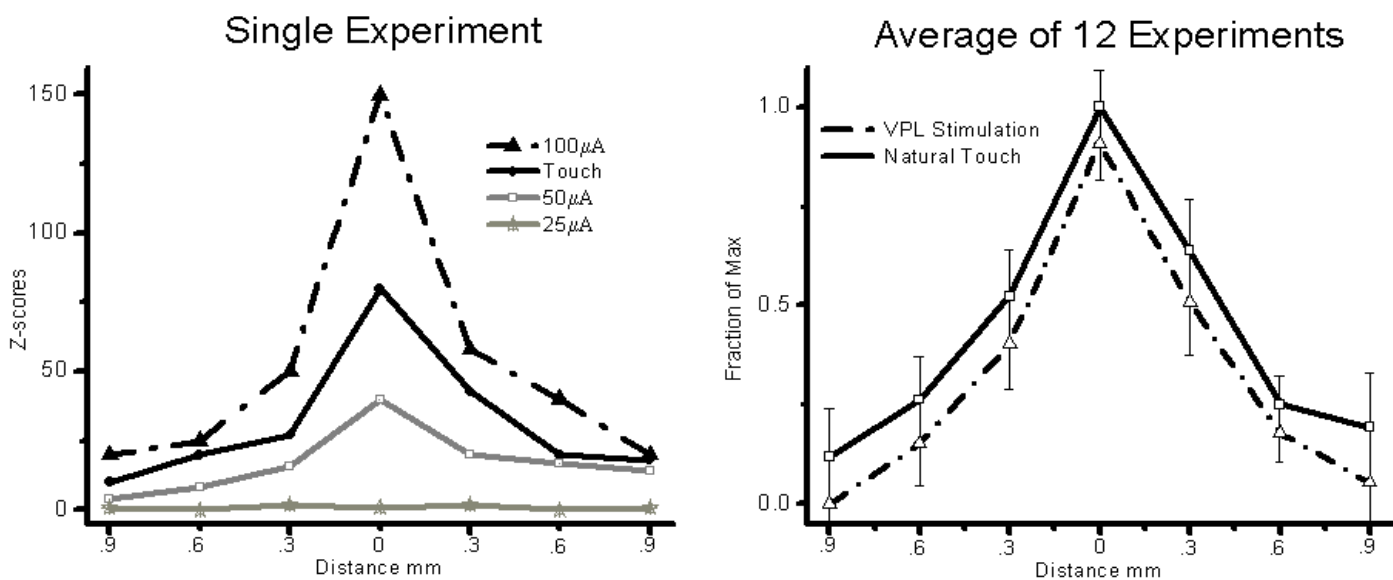

346

347 **Fig. 6:** VPL MiSt produces SFs comparable to natural touch in S1. **A**, SFs produced via VPL-MiSt or  
 348 touch from a typical experiment. **B**, Averaged stimulus fields from 15 natural touch and 7 bipolar VPL  
 349 stimulation experiments. VPL-MiSt was at 75  $\mu\text{A}$ . Each group depicts a pyramidal stimulus field  $\pm$

## Thalamic Microstimulation Towards Somatosensory Neuroprosthetics

350 standard errors (error bars). Note the similarity between the two curves. All MiSt were biphasic bipolar  
351 pulses with each phase 200  $\mu$ sec long. The X-axis is the distance in mm between cortical electrodes.

352

### 353 **Discussion**

354 In this paper, we have presented results that indicate MiSt in the VPL thalamus of NHPs can induce  
355 neural responses in S1 similar to those produced via natural touching of the hand, as we have  
356 previously demonstrated in the rat model (Choi et al., 2016; Choi and Francis, 2018). Despite the  
357 worry that VPL stimulation might provoke widespread nonspecific neural responses, we measured  
358 precise matches between the stimulus fields in the VPL stimulus sites and the stimulus fields in the  
359 activated regions of the S1 cortex. Small areas of single digits were readily discerned. This may be  
360 because the VPL thalamocortical fibers rapidly conduct somatotopically congruent axon bundles to  
361 circumscribed koniocortical target zones in S1. In contrast, antidromically activated corticothalamic  
362 fibers are relatively slow and dispersed. We observed that the sizes of the VPL-MiSt SFs in S1 cortex  
363 were tightly correlated with stimulus current, suggesting that the current spread approximately  
364 spherically in the thalamus before transmitting directly to the 2D surface of S1. We have conducted  
365 modeling of this spread in the rat (Choi et al., 2012), which improves our ability to model VPL MiSt  
366 and S1 activation patterns. Bipolar stimulation between two VPL electrodes spaced more than 1 mm  
367 apart produced two separate response areas in the S1 cortex. This suggests that the stimulation  
368 mainly occurred in the high-current density regions around the electrodes, which has been shown  
369 using optical techniques in other sensory areas (Histed et al., 2009).

370

371 The ability of the brief VPL MiSt to emulate the spatiotemporal characteristics of S1 cortical responses  
372 to simple natural touch implicates the thalamocortical path as the major determinant in at least  
373 initiating these responses, as would be expected. On the other hand, direct cortical MiSt leads to

## Thalamic Microstimulation Towards Somatosensory Neuroprosthetics

374 widespread inhibition that typically lasts for 100 ms in the rat with only a very brief initial excitatory  
375 response lasting about 2 ms (Butovas and Schwarz, 2003). We found that strong VPL stimulation in  
376 NHPs produced 5 or more oscillatory responses in the S1 cortex, while natural stimulation generally  
377 only produced 2-3 oscillatory responses. These oscillations occur at approximately 600 Hz and have  
378 been discussed previously (Baker et al., 2003). These results suggest that a possible mechanism for  
379 paresthesias is the highly synchronous nature of the VPL stimulation. Our conjecture, therefore, is  
380 that the ideal VPL-MiSt is one that closely approximates the response patterns produced by natural  
381 stimuli not only in the spatial extent, which has been the focus of this report but also concerning the  
382 fine temporal structure of the responses, as accomplished in our rodent work (Choi et al., 2016).  
383 However, we ultimately need to move such work into humans to address questions on the qualia of  
384 the evoked sensations.

385

386 The work we have presented was conducted with an anesthetized NHP preparation. However, we  
387 have obtained similar results in the awake restful state in rats indicating these ideas will at least hold  
388 in that neural state (Brockmeier et al., 2011). It seems prudent to replicate this in the awake NHP  
389 before moving to humans. Indeed, this is just the beginning of this work, as we expect that the awake,  
390 actively sensing state would be more complicated. We may need to consider information about other  
391 brain regions that feed into S1, such as the motor cortices, in addition to the current state of the S1  
392 cortex and VPL while utilizing VPL-MiSt. Recently it has been shown that S1 cortical activity is  
393 modulated by reward expectation (Pantoja et al., 2007; Ramakrishnan et al., 2017; Atique and Francis,  
394 2021), punishment expectation (Yao et al., 2021) and their delivery. Indicating such affective  
395 modulation should also be tested with somatosensory neuroprosthesis.

396

397 Recently much work has been conducted using MiSt of S1 cortex directly to evoke percepts (Talwar  
398 et al., 2002; London et al., 2008; O'Doherty et al., 2011; Flesher et al., 2021). Work such as that

## Thalamic Microstimulation Towards Somatosensory Neuroprosthetics

399 conducted by Romo et al. has shown that S1 MiSt can be used by nonhuman primates as  
400 somatosensory information in the flutter vibration domain (Romo et al., 1998, 2000), while others have  
401 shown artificial proprioception via learning (Dadarlat et al., 2015). In addition, our previous work  
402 utilizing the Roborat rat paradigm has allowed us to demonstrate somatosensory neural prosthetic  
403 capabilities in a rat model. We used MiSt of the primary somatosensory cortex in this previous work  
404 with clear results (Talwar et al., 2002). Our preliminary results using this same paradigm with VPL-  
405 MiSt have been successful, indicating that at least in the rat, such VPL-MiSt with single biphasic  
406 stimuli, like those presented here, are perceivable by the animal (data not shown).

407

408 Our neuroprosthetic techniques utilizes the production of a neural template generated via the natural  
409 peripheral sensory organ, such as the skin for touch in our case, and working toward minimizing the  
410 difference between that template and cortical responses induced via MiSt, such as VPL-MiSt in the  
411 present case (Brockmeier et al., 2011; Li et al., 2013b; Choi et al., 2016). Our model-based-  
412 methodologies (Li et al., 2013b, 2015; Choi et al., 2016; Choi and Francis, 2018) work when utilizing  
413 a simulation of the periphery and neural substrate as well. This model based approach, which allows  
414 us to directly compared neurophysiological characteristics of VPL stimulation vs. natural touch, or  
415 simulated cortical responses to touch (Song et al., 2013; Choi, J. et al., 2015), complements  
416 neurosurgical efforts (Hanajima et al., 2004; Ohara et al., 2004; Patel et al., 2006) that have been  
417 conducted utilizing electrical stimulation of the Vc thalamus and peripheral nerves directly. Significant  
418 work on Vc-MiSt has been conducted during surgical implantation of deep brain stimulators into the  
419 VIM thalamus for the treatment of tremor. Stimulation of the Vc in humans produces various  
420 paresthesias, especially tactile sensations in the core Vc area. Many MiSt-evoked sensations were  
421 reported as tingling, which could be related to the use of high frequency stimulation (about 150 Hz).  
422 These stimulus trains were found essential for evoking somatosensory perceptions in many, but not  
423 all cases. It has been shown that just a few pulses of stimulation can induce perceptions in humans  
424 (Patel et al., 2006).

## Thalamic Microstimulation Towards Somatosensory Neuroprosthetics

425

426 The possibility of future optogenetic implementations of the basic ideas put forth in this paper have  
427 already been shown in the retina (Nirenberg and Pandarinath, 2012). Others have described some of  
428 the difficulties with current light sensitive ion channels injected into the somatosensory thalamus  
429 (Cruikshank SJ et al., 2010) as well as targeting these into the appropriate areas along with possible  
430 solutions to such problems (Yizhar O et al., 2011). A very attractive aspect of these techniques is the  
431 fact that the VPL thalamus is a small deep brain structure that can be inject with channelrhodopsins,  
432 have them transported to the thalamocortical terminals (Cruikshank SJ,Urabe H,Nurmikko AV and  
433 Connors BW, 2010), and then use an optical array at the larger, somatosensory cortex, at least for  
434 areas 1 and 2. However, as much of the S1 cortical region related to fine touch and proprioception is  
435 buried in the central sulcus in humans and NHPs, it may still be difficult to access without causing  
436 some damage. In addition, obtaining fine spatial and temporal optical stimulation at depth below the  
437 cortical surface without causing damage is still a challenge. As high-density arrays of micro- and even  
438 nano- electrodes are evolving, it is very likely that electrical stimulation will remain the chosen  
439 intervention for clinical applications.

440

441

442

443

444

445

446

## Thalamic Microstimulation Towards Somatosensory Neuroprosthetics

- 447 Ajiboye, A. B., Willett, F. R., Young, D. R., Memberg, W. D., Murphy, B. A., Miller, J. P., et al. (2017).  
448 Restoration of reaching and grasping movements through brain-controlled muscle  
449 stimulation in a person with tetraplegia: a proof-of-concept demonstration. *Lancet* 389, 1821–  
450 1830. doi:10.1016/S0140-6736(17)30601-3.
- 451 Atique, M. M. U., and Francis, J. T. (2021). Mirror Neurons are Modulated by Grip Force and  
452 Reward Expectation in the Sensorimotor Cortices (S1, M1, PMd, PMv). *Scientific Reports*  
453 August 2021. doi:10.1038/s41598-021-95536-z.
- 454 Baker, S. N., Gabriel, C., and Lemon, R. N. (2003). EEG oscillations at 600 Hz are macroscopic  
455 markers for cortical spike bursts. *The Journal of Physiology* 550, 529–534.  
456 doi:10.1113/jphysiol.2003.045674.
- 457 Brockmeier, A. J., Choi, J. S., DiStasio, M. M., Francis, J. T., and Principe, J. C. (2011). Optimizing  
458 microstimulation using a reinforcement learning framework. in *2011 Annual International*  
459 *Conference of the IEEE Engineering in Medicine and Biology Society*, 1069–1072.  
460 doi:10.1109/IEMBS.2011.6090249.
- 461 Butovas, S., and Schwarz, C. (2003). Spatiotemporal Effects of Microstimulation in Rat Neocortex: A  
462 Parametric Study Using Multielectrode Recordings. *Journal of Neurophysiology* 90, 3024–  
463 3039. doi:10.1152/jn.00245.2003.
- 464 Chapin, J. K., Moxon, K. A., Markowitz, R. S., and Nicolelis, M. A. (1999). Real-time control of a  
465 robot arm using simultaneously recorded neurons in the motor cortex. *Nat Neurosci* 2, 664–  
466 70.
- 467 Chien, J. H., Korzeniewska, A., Colloca, L., Campbell, C., Dougherty, P., and Lenz, F. (2017).  
468 Human Thalamic Somatosensory Nucleus (Ventral Caudal, Vc) as a Locus for Stimulation by  
469 INPUTS from Tactile, Noxious and Thermal Sensors on an Active Prosthesis. *Sensors* 17,  
470 1197. doi:10.3390/s17061197.
- 471 Choi, J., C., Menzies, R. J., Dura-Bernal, S., Francis, J. T., Lytton, W. W., and Kerr, C. C. (2015).  
472 Spiking network modeling of neuronal dynamics in individual rats. in, 122.
- 473 Choi, J., and Francis, J. T. (2018). Biomimetic multichannel neurostimulation. *US Patent 9974957*.
- 474 Choi, J. S., Brockmeier, A. J., McNeil, D. B., Kraus, L. M., Principe, J. C., and Francis, J. T. (2016).  
475 Eliciting naturalistic cortical responses with a sensory prosthesis via optimized  
476 microstimulation. *J Neural Eng* 13, 056007. doi:10.1088/1741-2560/13/5/056007.
- 477 Choi, J. S., DiStasio, M. M., Brockmeier, A. J., and Francis, J. T. (2012). An electric field model for  
478 prediction of somatosensory (S1) cortical field potentials induced by ventral posterior lateral  
479 (VPL) thalamic microstimulation. *IEEE Trans Neural Syst Rehabil Eng* 20, 161–9.  
480 doi:10.1109/TNSRE.2011.2181417.
- 481 Dadarlat, M. C., O'Doherty, J. E., and Sabes, P. N. (2015). A learning-based approach to artificial  
482 sensory feedback leads to optimal integration. *Nat Neurosci* 18, 138–44.  
483 doi:10.1038/nn.3883.
- 484 Davis, K. D., Kiss, Z. H. T., Luo, L., Tasker, R. R., Lozano, A. M., and Dostrovsky, J. O. (1998).  
485 Phantom sensations generated by thalamic microstimulation. *Nature* 391, 385–387.  
486 doi:10.1038/34905.



## Thalamic Microstimulation Towards Somatosensory Neuroprosthetics

- 487 Davis, K. D., Lozano, A. M., Manduch, M., Tasker, R. R., Kiss, Z. H. T., and Dostrovsky, J. O.  
488 (1999). Thalamic Relay Site for Cold Perception in Humans. *Journal of Neurophysiology* 81,  
489 1970–1973. doi:10.1152/jn.1999.81.4.1970.
- 490 Degenhart, A. D., Bishop, W. E., Oby, E. R., Tyler-Kabara, E. C., Chase, S. M., Batista, A. P., et al.  
491 (2020). Stabilization of a brain–computer interface via the alignment of low-dimensional  
492 spaces of neural activity. *Nat Biomed Eng* 4, 672–685. doi:10.1038/s41551-020-0542-9.
- 493 Fitzsimmons, N. A., Drake, W., Hanson, T. L., Lebedev, M. A., and Nicolelis, M. a. L. (2007).  
494 Primate Reaching Cued by Multichannel Spatiotemporal Cortical Microstimulation. *J.*  
495 *Neurosci.* 27, 5593–5602. doi:10.1523/JNEUROSCI.5297-06.2007.
- 496 Flesher, S. N., Collinger, J. L., Foldes, S. T., Weiss, J. M., Downey, J. E., Tyler-Kabara, E. C., et al.  
497 (2016). Intracortical microstimulation of human somatosensory cortex. *Sci Transl Med* 8,  
498 361ra141. doi:10.1126/scitranslmed.aaf8083.
- 499 Flesher, S. N., Downey, J. E., Weiss, J. M., Hughes, C. L., Herrera, A. J., Tyler-Kabara, E. C., et al.  
500 (2021). A brain-computer interface that evokes tactile sensations improves robotic arm  
501 control. *Science* 372, 831–836. doi:10.1126/science.abd0380.
- 502 Francis, J. T., Xu, S., and Chapin, J. K. (2008). Proprioceptive and cutaneous representations in the  
503 rat ventral posterolateral thalamus. *J Neurophysiol* 99, 2291–304.  
504 doi:10.1152/jn.01206.2007.
- 505 Ganguly, K., and Carmena, J. M. (2009). Emergence of a stable cortical map for neuroprosthetic  
506 control. *PLoS Biol* 7, e1000153. doi:10.1371/journal.pbio.1000153.
- 507 Hanajima, R., Chen, R., Ashby, P., Lozano, A. M., Hutchison, W. D., Davis, K. D., et al. (2004). Very  
508 Fast Oscillations Evoked by Median Nerve Stimulation in the Human Thalamus and  
509 Subthalamic Nucleus. *Journal of Neurophysiology* 92, 3171–3182.  
510 doi:10.1152/jn.00363.2004.
- 511 Histed, M. H., Bonin, V., and Reid, R. C. (2009). Direct Activation of Sparse, Distributed Populations  
512 of Cortical Neurons by Electrical Microstimulation. *Neuron* 63, 508–522.  
513 doi:10.1016/j.neuron.2009.07.016.
- 514 Hochberg, L. R., Serruya, M. D., Friehs, G. M., Mukand, J. A., Saleh, M., Caplan, A. H., et al.  
515 (2006). Neuronal ensemble control of prosthetic devices by a human with tetraplegia. *Nature*  
516 442, 164–71.
- 517 Kaas, J. H. (2007). “3.35 - The Evolution of the Dorsal Thalamus in Mammals,” in *Evolution of*  
518 *Nervous Systems*, ed. J. H. Kaas (Oxford: Academic Press), 499–516. doi:10.1016/B0-12-  
519 370878-8/00089-6.
- 520 Kiss, Z. H. T., Anderson, T., Hansen, T., Kirstein, D., Suchowersky, O., and Hu, B. (2003a). Neural  
521 substrates of microstimulation-evoked tingling: a chronaxie study in human somatosensory  
522 thalamus. *European Journal of Neuroscience* 18, 728–732. doi:10.1046/j.1460-  
523 9568.2003.02793.x.
- 524 Kiss, Z. H. T., Davis, K. D., Tasker, R. R., Lozano, A. M., Hu, B., and Dostrovsky, J. O. (2003b).  
525 Kinaesthetic neurons in thalamus of humans with and without tremor. *Exp Brain Res* 150,  
526 85–94. doi:10.1007/s00221-003-1399-3.



## Thalamic Microstimulation Towards Somatosensory Neuroprosthetics

- 527 Krubitzer, L. A., and Kaas, J. H. (1992). The somatosensory thalamus of monkeys: Cortical  
528 connections and a redefinition of nuclei in marmosets. *Journal of Comparative Neurology*  
529 319, 123–140. doi:10.1002/cne.903190111.
- 530 Lenz, F. A., Gracely, R. H., Romanoski, A. J., Hope, E. J., Rowland, L. H., and Dougherty, P. M.  
531 (1995). Stimulation in the human somatosensory thalamus can reproduce both the affective  
532 and sensory dimensions of previously experienced pain. *Nat Med* 1, 910–913.  
533 doi:10.1038/nm0995-910.
- 534 Li, K., Dura-Bernal, S., Francis, J. T., Lytton, W., and Principe, J. C. (2015). Repairing lesions via  
535 kernel adaptive inverse control in a biomimetic model of sensorimotor cortex. *IEEE 7th*  
536 *International EMBS Conference*.
- 537 Li, L., Brockmeier, A., Choi, J. S., Francis, J. T., Sanchez, J. C., and Principe, J. C. (2013a). A  
538 tensor product kernel framework for multiscale neural activity decoding and control.  
539 *Computational intelligence and neuroscience* under review special issue Modeling and  
540 Analysis of Neural Spike Trains.
- 541 Li, L., Park, I. M., Brockmeier, A., Chen, B., Seth, S., Francis, J. T., et al. (2013b). Adaptive inverse  
542 control of neural spatiotemporal spike patterns with a reproducing kernel Hilbert space  
543 (RKHS) framework. *IEEE Trans Neural Syst Rehabil Eng* 21, 532–43.  
544 doi:10.1109/TNSRE.2012.2200300.
- 545 London, B. M., Jordan, L. R., Jackson, C. R., and Miller, L. E. (2008). Electrical Stimulation of the  
546 Proprioceptive Cortex (Area 3a) Used to Instruct a Behaving Monkey. *IEEE Transactions on*  
547 *Neural Systems and Rehabilitation Engineering* 16, 32–36.  
548 doi:10.1109/TNSRE.2007.907544.
- 549 Nirenberg, S., and Pandarinath, C. (2012). Retinal prosthetic strategy with the capacity to restore  
550 normal vision. *Proc Natl Acad Sci U S A* 109, 15012–7. doi:10.1073/pnas.1207035109.
- 551 O’Doherty, J. E., Lebedev, M. A., Ifft, P. J., Zhuang, K. Z., Shokur, S., Bleuler, H., et al. (2011).  
552 Active tactile exploration using a brain-machine-brain interface. *Nature* 479, 228–31.  
553 doi:10.1038/nature10489.
- 554 Ohara, S., Weiss, N., and Lenz, F. A. (2004). Microstimulation in the Region of the Human Thalamic  
555 Principal Somatic Sensory Nucleus Evokes Sensations Like Those of Mechanical  
556 Stimulation and Movement. *Journal of Neurophysiology* 91, 736–745.  
557 doi:10.1152/jn.00648.2003.
- 558 Pantoja, J., Ribeiro, S., Wiest, M., Soares, E., Gervasoni, D., Lemos, N. A., et al. (2007). Neuronal  
559 activity in the primary somatosensory thalamocortical loop is modulated by reward  
560 contingency during tactile discrimination. *J Neurosci* 27, 10608–20.  
561 doi:10.1523/JNEUROSCI.5279-06.2007.
- 562 Patel, S., Ohara, S., Dougherty, P. M., Gracely, R. H., and Lenz, F. A. (2006). Psychophysical  
563 Elements of Place and Modality Specificity in the Thalamic Somatic Sensory Nucleus  
564 (Ventral Caudal, Vc) of Awake Humans. *Journal of Neurophysiology* 95, 646–659.  
565 doi:10.1152/jn.00756.2005.
- 566 Paxinos, G., Huang, X.-F., and Toga, A. (2000). The Rhesus Monkey Brain in Stereotaxic  
567 Coordinates. *Faculty of Health and Behavioural Sciences - Papers (Archive)*. Available at:  
568 <https://ro.uow.edu.au/hbspapers/3613>.

## Thalamic Microstimulation Towards Somatosensory Neuroprosthetics

- 569 Ramakrishnan, A., Byun, Y. W., Rand, K., Pedersen, C. E., Lebedev, M. A., and Nicolelis, M. A. L.  
570 (2017). Cortical neurons multiplex reward-related signals along with sensory and motor  
571 information. *Proc Natl Acad Sci U S A* 114, E4841–E4850. doi:10.1073/pnas.1703668114.
- 572 Romo, R., Hernández, A., Zainos, A., Brody, C. D., and Lemus, L. (2000). Sensing without  
573 Touching: Psychophysical Performance Based on Cortical Microstimulation. *Neuron* 26,  
574 273–278. doi:10.1016/S0896-6273(00)81156-3.
- 575 Romo, R., Hernández, A., Zainos, A., and Salinas, E. (1998). Somatosensory discrimination based  
576 on cortical microstimulation. *Nature* 392, 387–390. doi:10.1038/32891.
- 577 Sacco, R. L., Bello, J. A., Traub, R., and Brust, J. C. (1987). Selective proprioceptive loss from a  
578 thalamic lacunar stroke. *Stroke* 18, 1160–1163. doi:10.1161/01.STR.18.6.1160.
- 579 Serruya, M. D., Hatsopoulos, N. G., Paninski, L., Fellows, M. R., and Donoghue, J. P. (2002).  
580 Instant neural control of a movement signal. *Nature* 416, 141–142. doi:10.1038/416141a.
- 581 Song, W. G., Kerr, C. C., Lytton, W. W., and Francis, J. T. (2013). Cortical Plasticity Induced by  
582 Spike-Triggered Microstimulation in Primate Somatosensory Cortex. *PLoS One* 8. doi:ARTN  
583 e57453 10.1371/journal.pone.0057453.
- 584 Talwar, S. K., Xu, S., Hawley, E. S., Weiss, S. A., Moxon, K. A., and Chapin, J. K. (2002). Rat  
585 navigation guided by remote control. *Nature* 417, 37–8. doi:10.1038/417037a.
- 586 Taylor, D. M., Tillery, S. I., and Schwartz, A. B. (2002). Direct cortical control of 3D neuroprosthetic  
587 devices. *Science* 296, 1829–32. doi:10.1126/science.1070291.
- 588 Yao, Z., Hessburg, J. P., and Francis, J. T. (2021). Normalization by Valence and Motivational  
589 Intensity in the Sensorimotor Cortices (PMd, rM1, and cS1). doi:10.1101/702050.
- 590
- 591
- 592
- 593
- 594
- 595
- 596
- 597
